# Supplementary figures and images for: The Landscape and Implications of Chimeric RNAs in Cervical Cancer
Source: PubMed Central journal article supplement — eBioMedicine. 2018 Oct 31;37:158–67. doi: 10.1016/j.ebiom.2018.10.059 (PMC6286271; doi:10.1016/j.ebiom.2018.10.059), 2018-10-31

## TCGA hepatocellular carcinoma

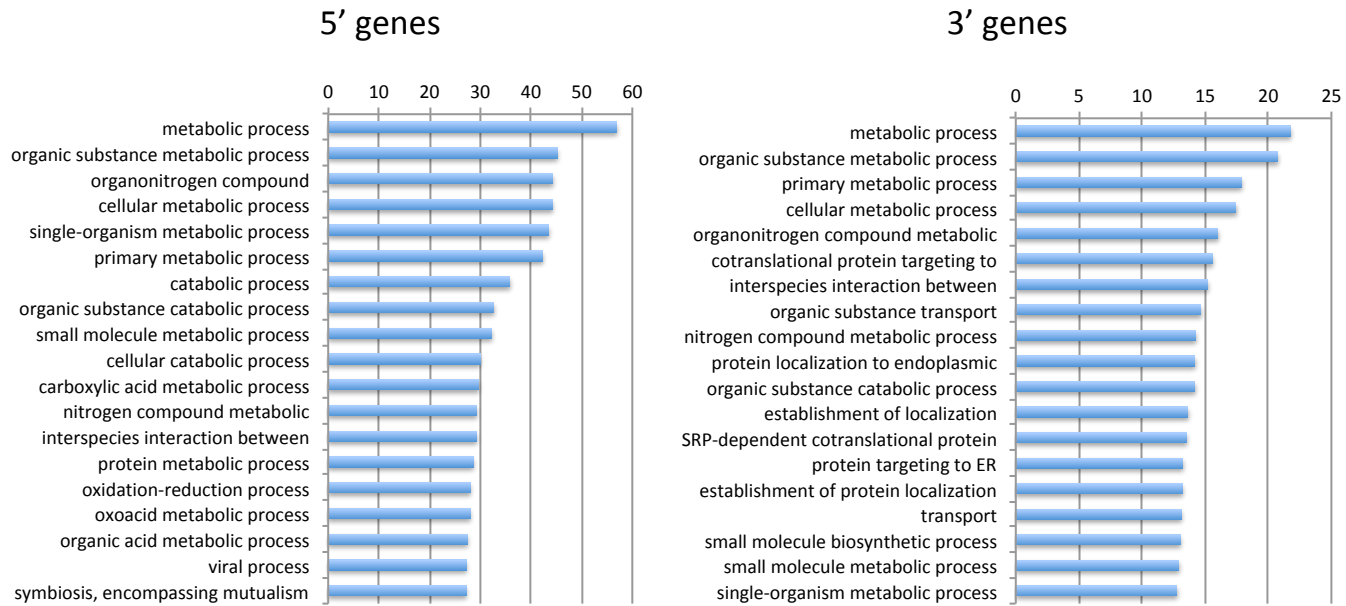

Fig. S1

## TCGA glioblastoma

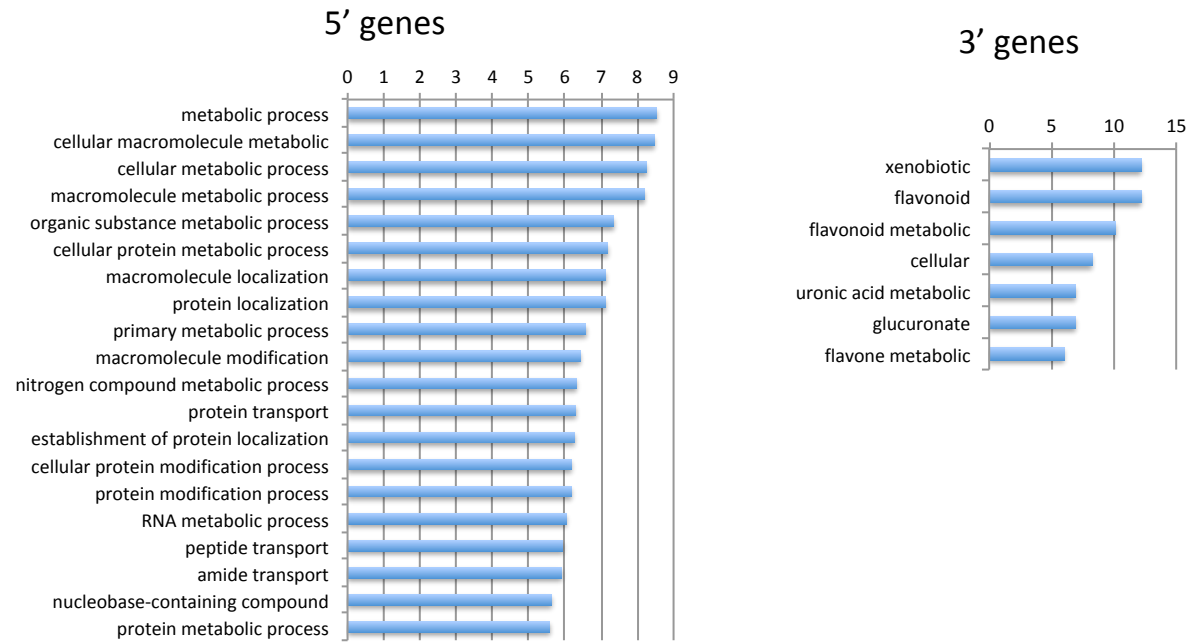

Fig. S2

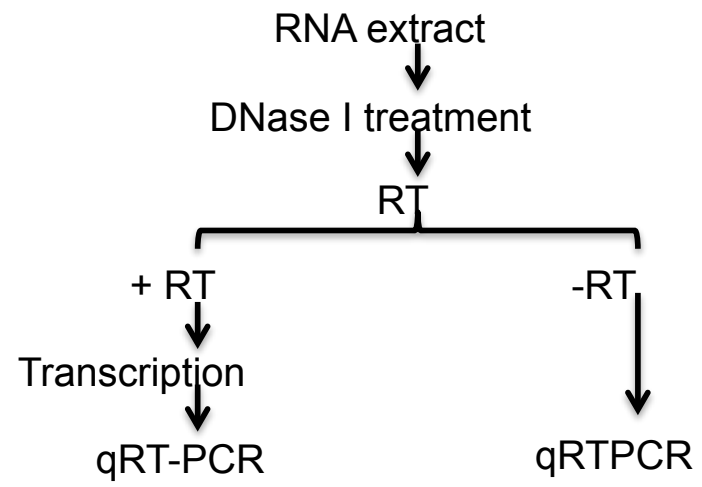

**Fig. S3**

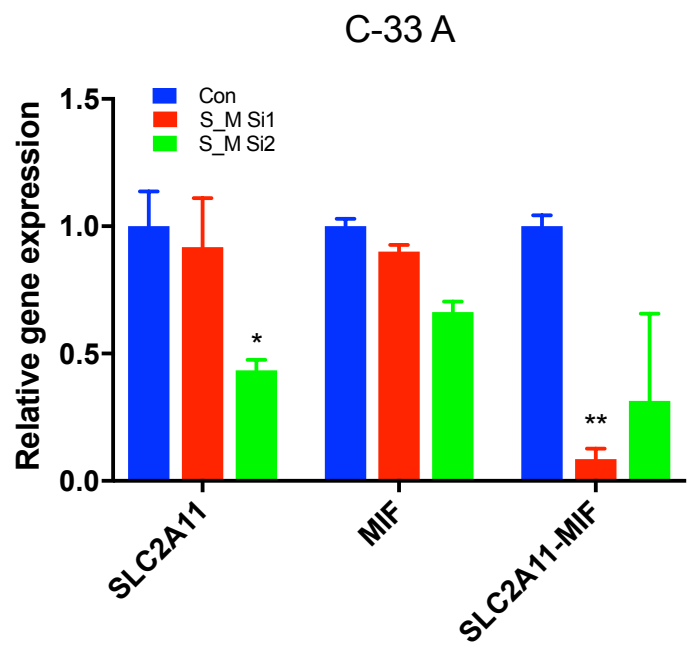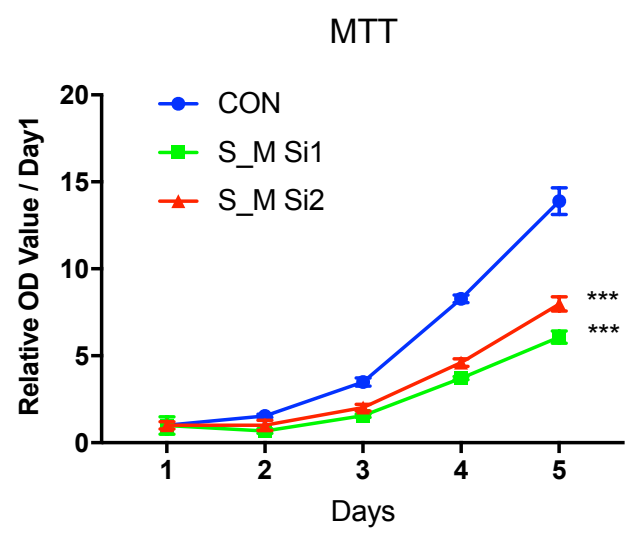

Fig. S4

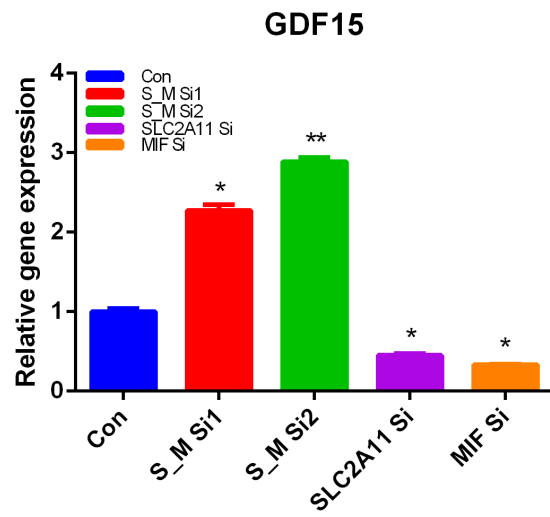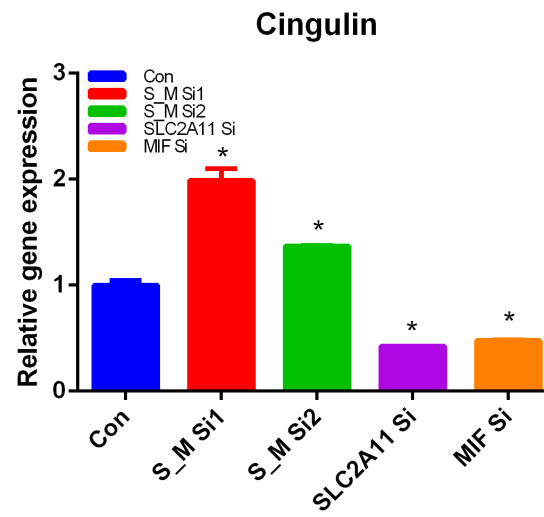

Fig. S5

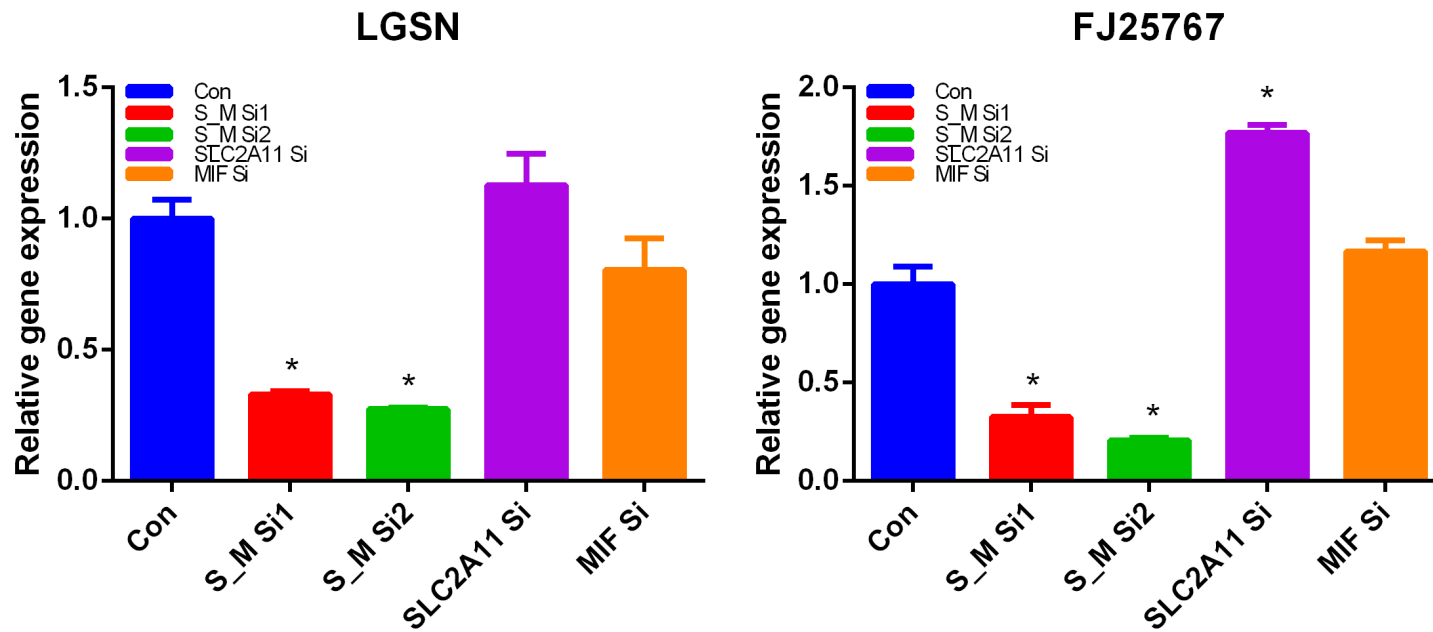

Fig. S6

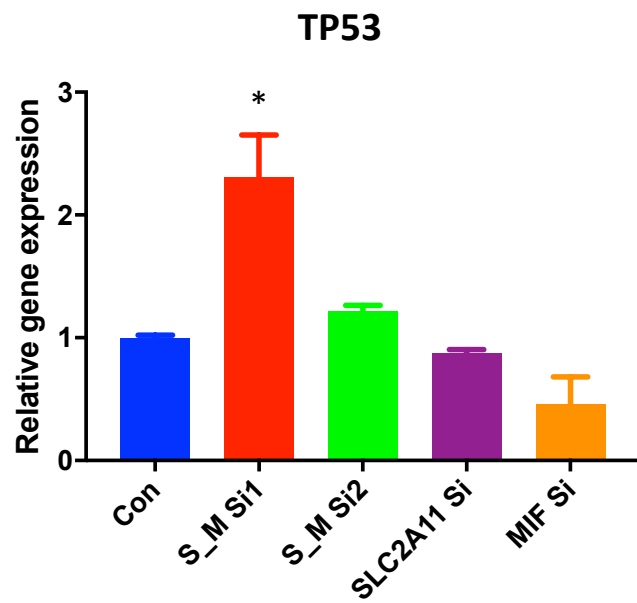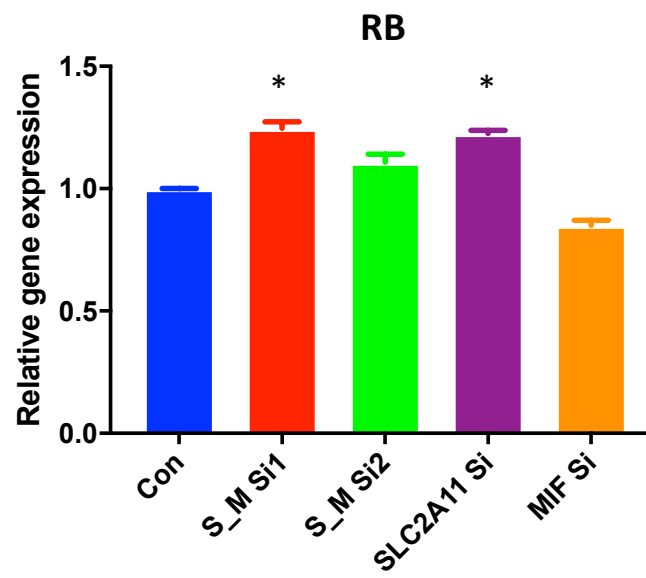

Fig. S7

Supplement: mmc2.pdf [file mmc2.pdf]
